# Supplementary material
Source: PubMed Central journal article supplement (PMC8382588)
Supplement: mmc1.pdf [file mmc1.pdf]

# THE LANCET

## Digital Health

### Supplementary appendix

This appendix formed part of the original submission and has been peer reviewed. We post it as supplied by the authors.

Supplement to: Sudre CH, Keshet A, Graham MS, et al. Anosmia, ageusia, and other COVID-19-like symptoms in association with a positive SARS-CoV-2 test, across six national digital surveillance platforms: an observational study. *Lancet Digit Health* 2021; published online July 22. [https://doi.org/10.1016/S2589-7500\(21\)00115-1](https://doi.org/10.1016/S2589-7500(21)00115-1).

## Supplementary material - Web material

### Supplementary figure 1: CMU/UMD platform weights and filtering sensitivity analysis

a) CMU/UMD platform odds ratios (95% confidence intervals) sensitivity analyses with and without survey weights for US-CMU/UMD, UK-CMU/UMD and Israel-CMU/UMD for the entire study period. Additional sensitivity analyses with US-CMU/UMD showing (b) number of reported tests and positive tests and (c) moving 5-week Odds Ratios effect estimates alongside sensitivity analyses with strict filtering (including surveys with no more than 5, 10 and 13 of 14 symptoms reported during the prior 24 hours), or with survey weights (all other OR are unweighted). For survey weight analyses, Facebook Active User Base “raked” to the national census population<sup>34</sup>.

#### (a) Sensitivity analysis of raw vs survey-weighted OR by country

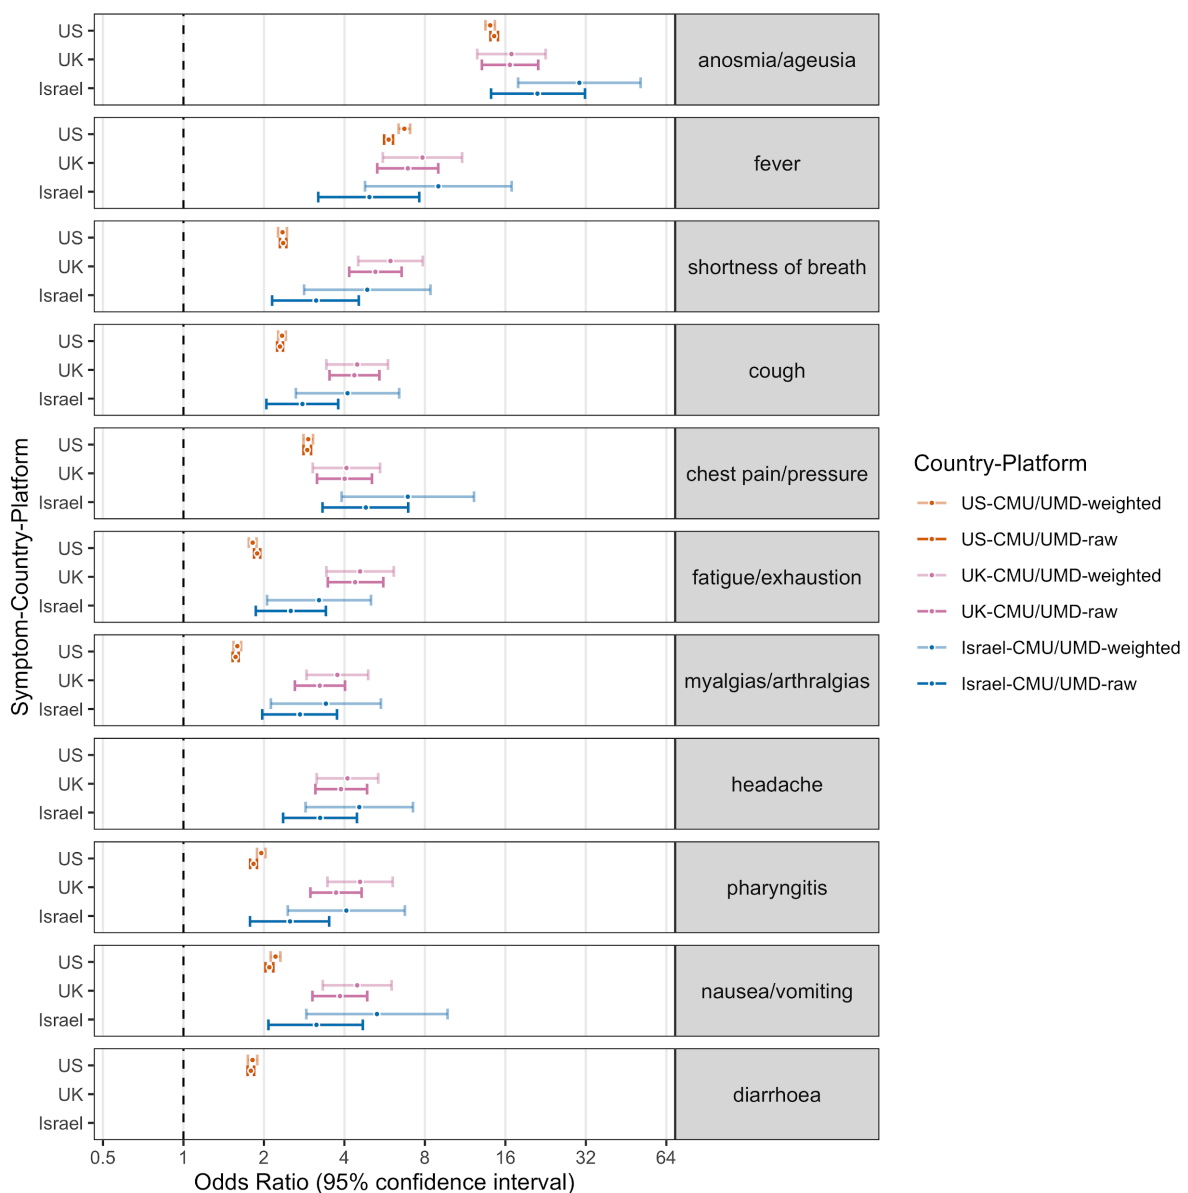

#### (b) Sensitivity analysis of test positivity for survey-weighted vs raw with symptom-count filters over time.

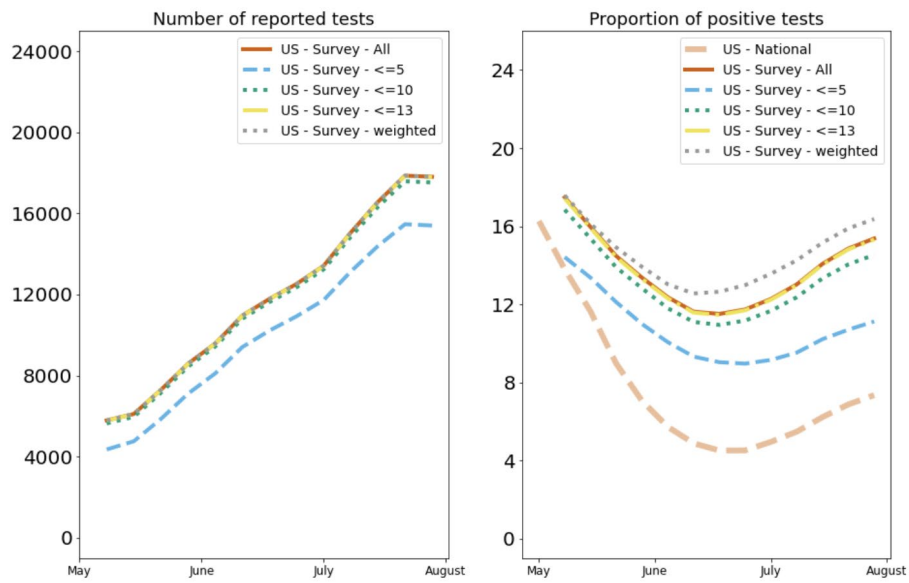

(c) Sensitivity analysis of OR for survey-weighted vs raw with symptom-count filters over time.

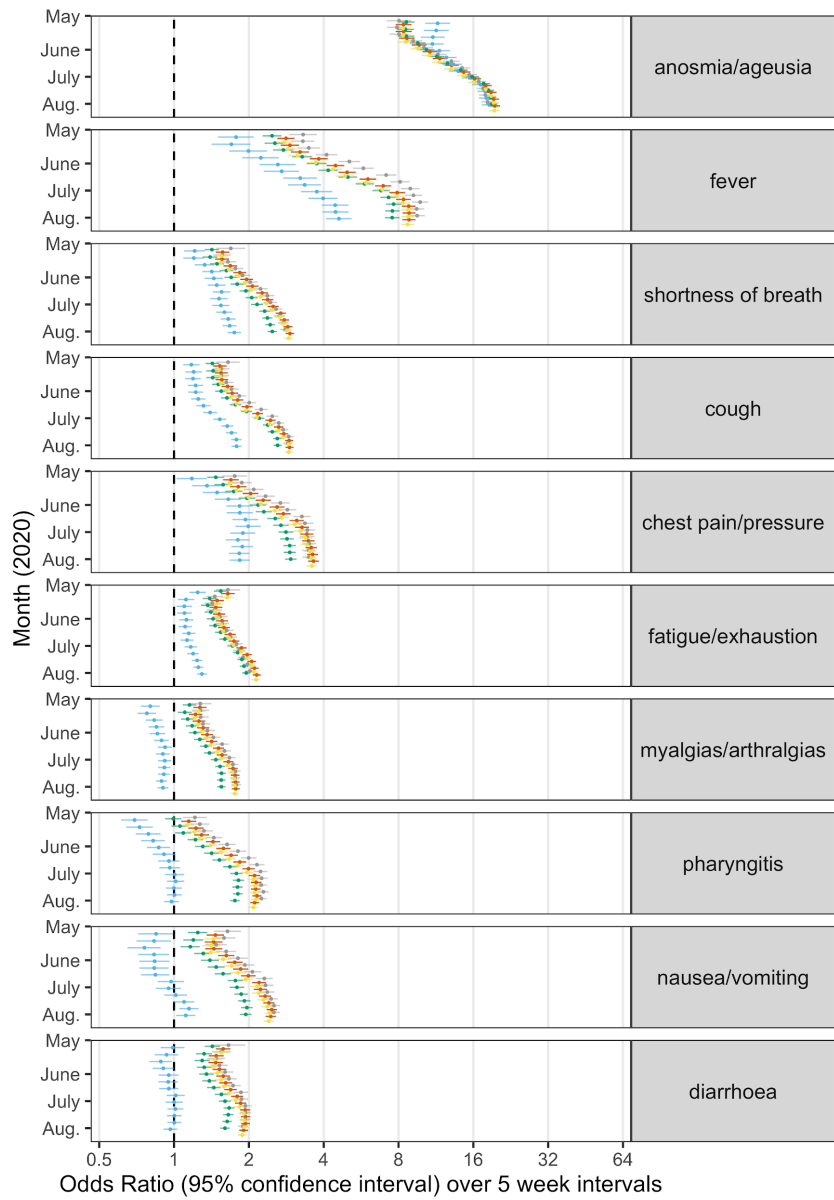

Country-Platform

- US-CMU/UMD-Weighted
- US-CMU/UMD-Symptoms <= 13
- US-CMU/UMD-Symptoms <= 10
- US-CMU/UMD-Symptoms <= 5
- US-CMU/UMD-All

## Supplementary figure 2: CMU/UMD illness duration sensitivity analysis

Sensitivity analyses of CMU/UMD demonstrating short (14 days) versus long (21 days) symptom-to-test window or varying illness duration during the study period. In CMU/UMD, a cross-sectional survey, illness duration of 3, 7, 14 and 21. The timing of the test relative to symptoms is unknown in the US-CMU/UMD while the test result reported was during the period of illness in the ex-US-CMU/UMD data (capped at 14 days). Most symptoms have higher associations with test positivity. In addition, (b) we show the trajectory of test positive less than 14 and 21 days in US-CMU/UMD in 5 week intervals is more similar to the national pattern, reflecting more incident than prevalent illness with test results. Sensitivity OR are unweighted.

### (a) Sensitivity analysis of OR for illness duration

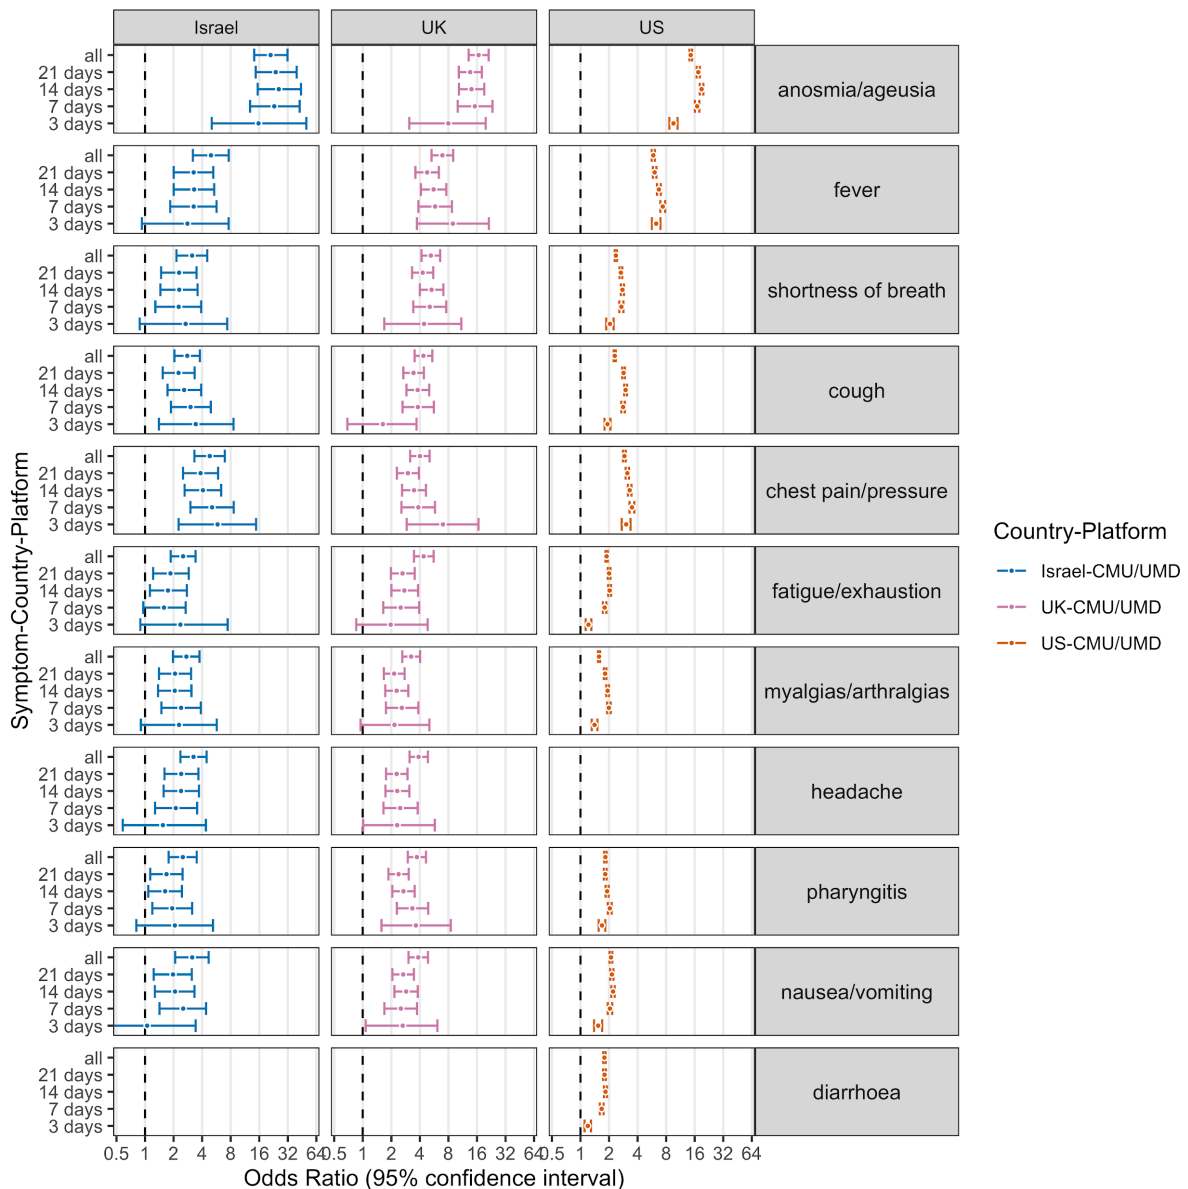

### (b) Sensitivity analysis of test positivity for illness duration

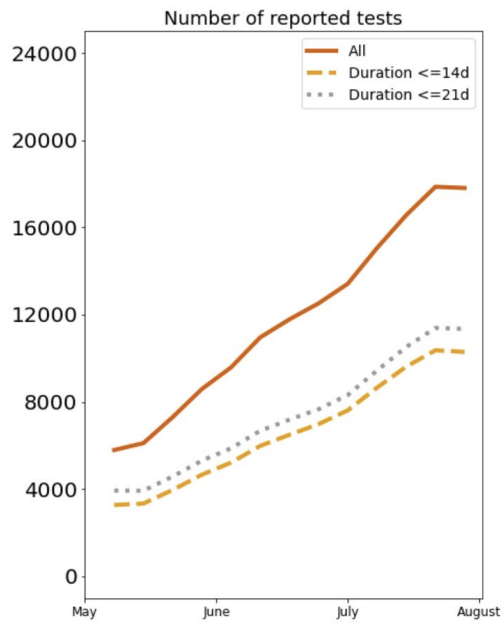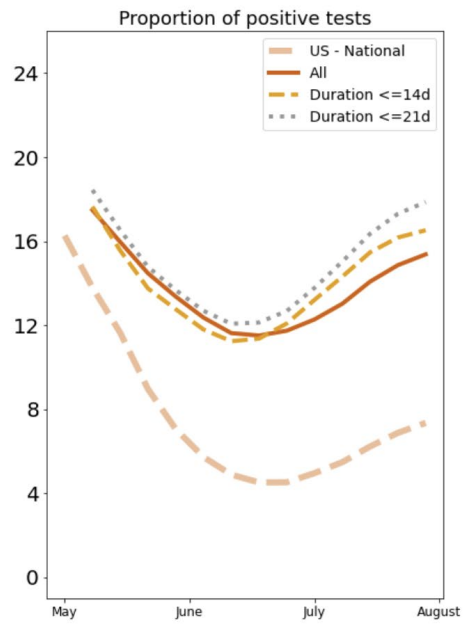

### Supplementary figure 3: UK-Zoe invited testing sensitivity analysis

In the UK-Zoe study, beginning 29 April 2020, oligosymptomatic individuals were invited to participate in platform-sponsored SARS-CoV-2 PCR testing, regardless of whether they met testing guidelines in the region. In the UK-Zoe platform primary analysis, invited-test respondents and not invited-test were combined. Here we show test positivity and OR stratified by whether respondents were or were not invited to test. For those with repeated tests, negative test results following a positive test were censored. Invited data are plotted starting from the first 5-week bin, while the full data are plotted from study inception (which includes increasing numbers of invited tests). Panel (a) number of reported tests and positive tests for each 5-week bin, and panel (b) odds ratios for the study period for UK-Zoe participants invited and not-invited to test with few symptoms, alongside the combined analysis..

(a) Sensitivity analysis of test positivity for invited and non-invited test UK-Zoe participants

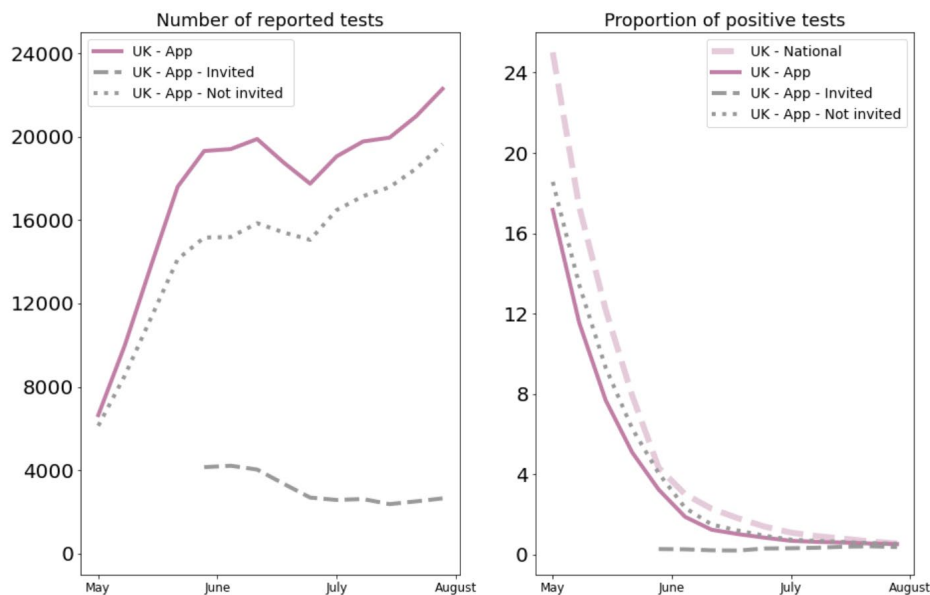

(b) Sensitivity analysis of OR for invited and not-invited test UK-Zoe test participants

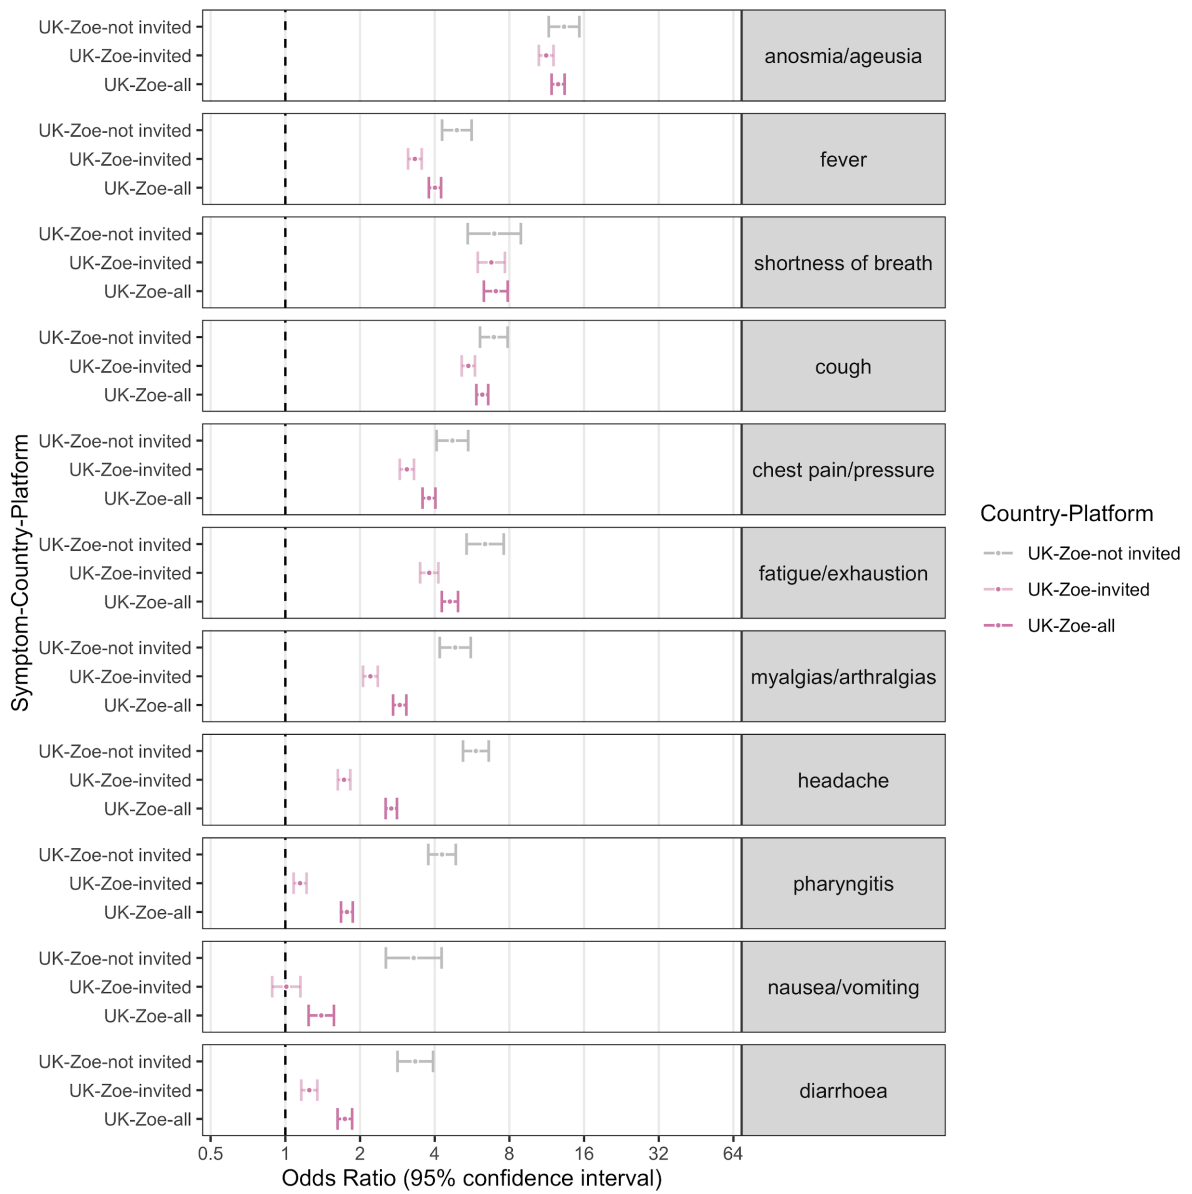



### Supplementary Figure 4: Temporal trends in symptom-test positivity association

Country-platform data aggregated over 9-week windows to show temporal trends with expansion of testing, broadening of testing criteria and change in prevalence during the study period. Sensitivity OR for CMU/UMD are unweighted.

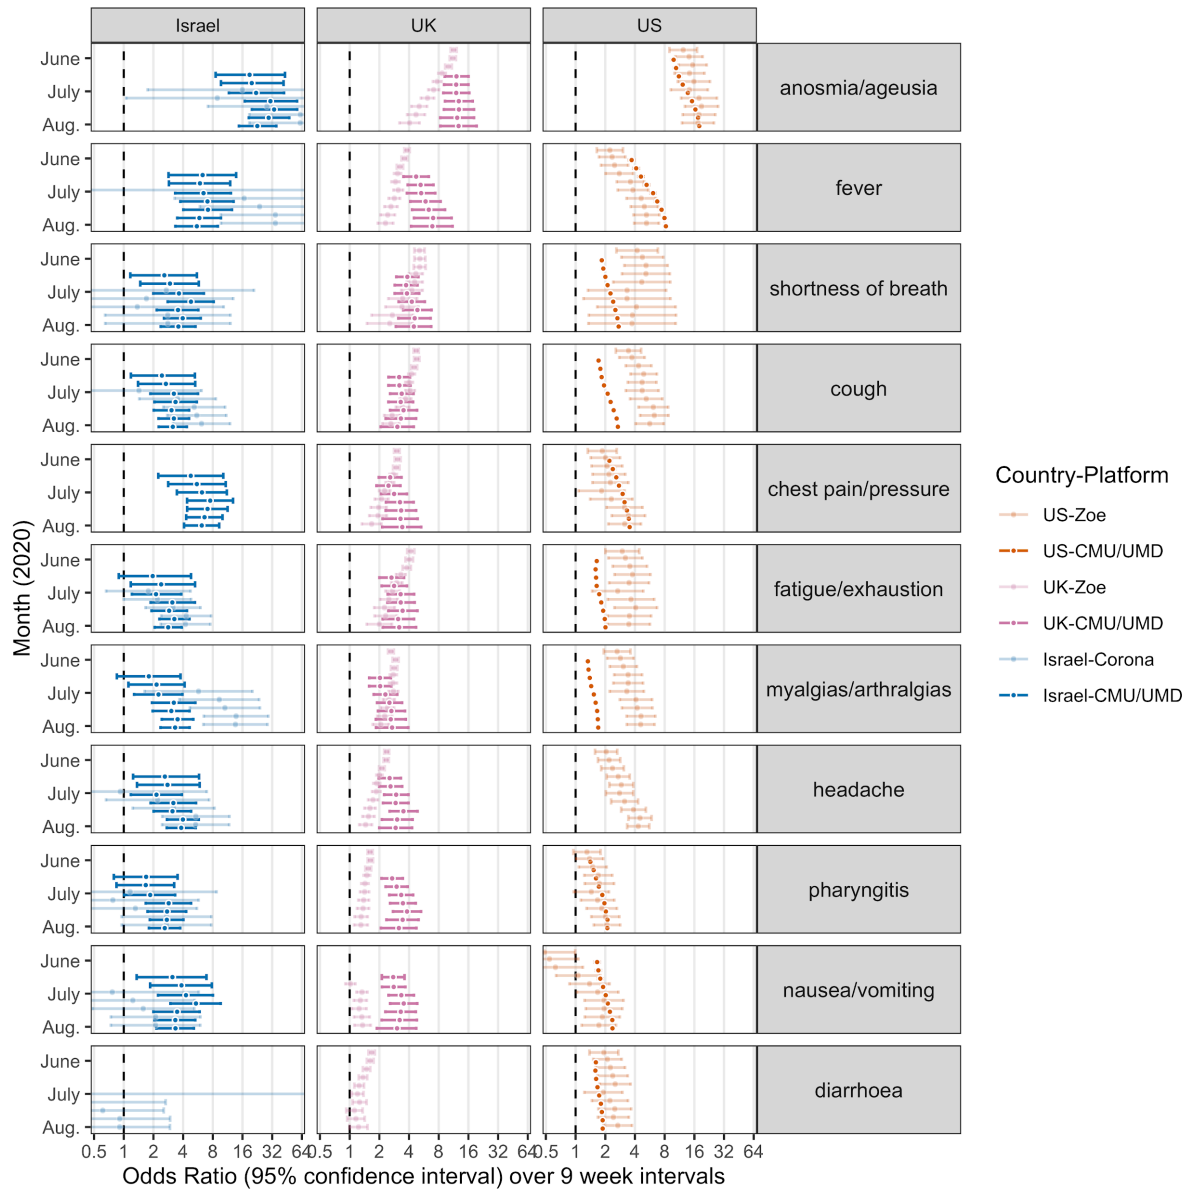

**Supplementary figure 5: Sensitivity analysis of opt-in platform demographics.**

UK-Zoe effect estimates by region for three canonical COVID-19 (a) and age-sex strata over time using 9-week intervals (b). Although there are differences in the width of confidence intervals and magnitude of the point estimates, the relative importance of these three symptoms are consistent, i.e. anosmia/ageusia the most strongly associated with test positivity.

(a) Sensitivity analysis of effect estimates for anosmia/ageusia, fever and cough by geographic region (top) and age-sex strata (bottom)

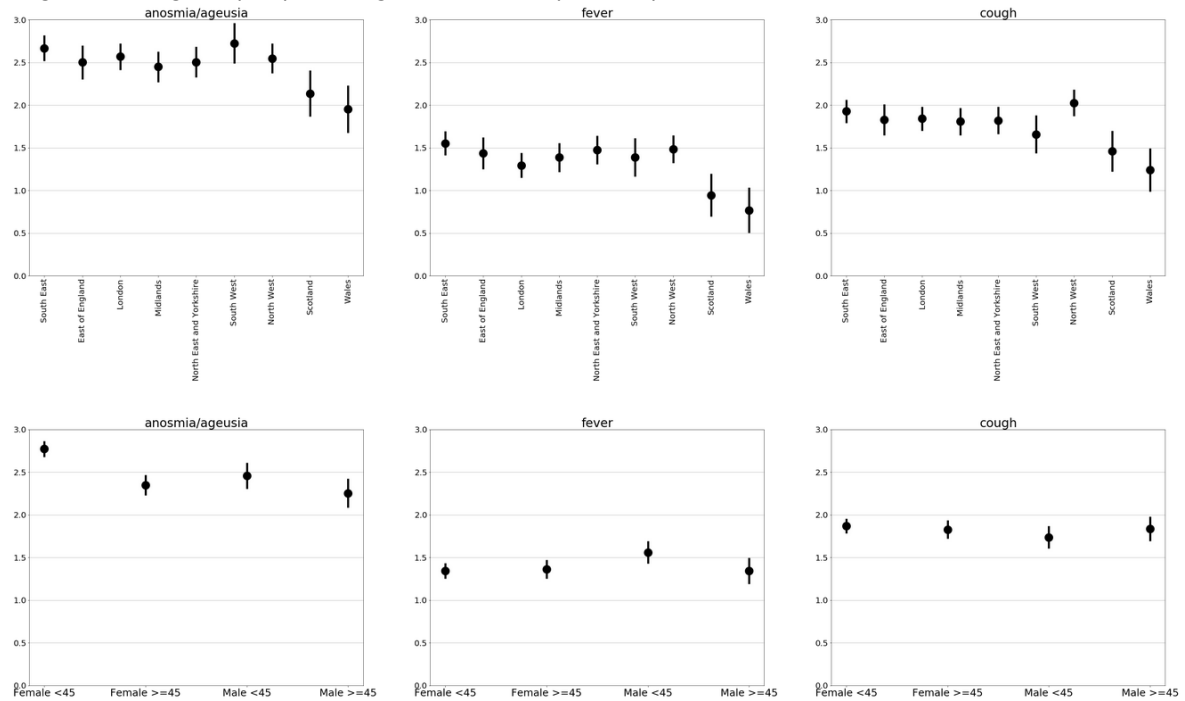

(b) Sensitivity analysis of effect estimates over time with and without adjusting for age and sex as covariates

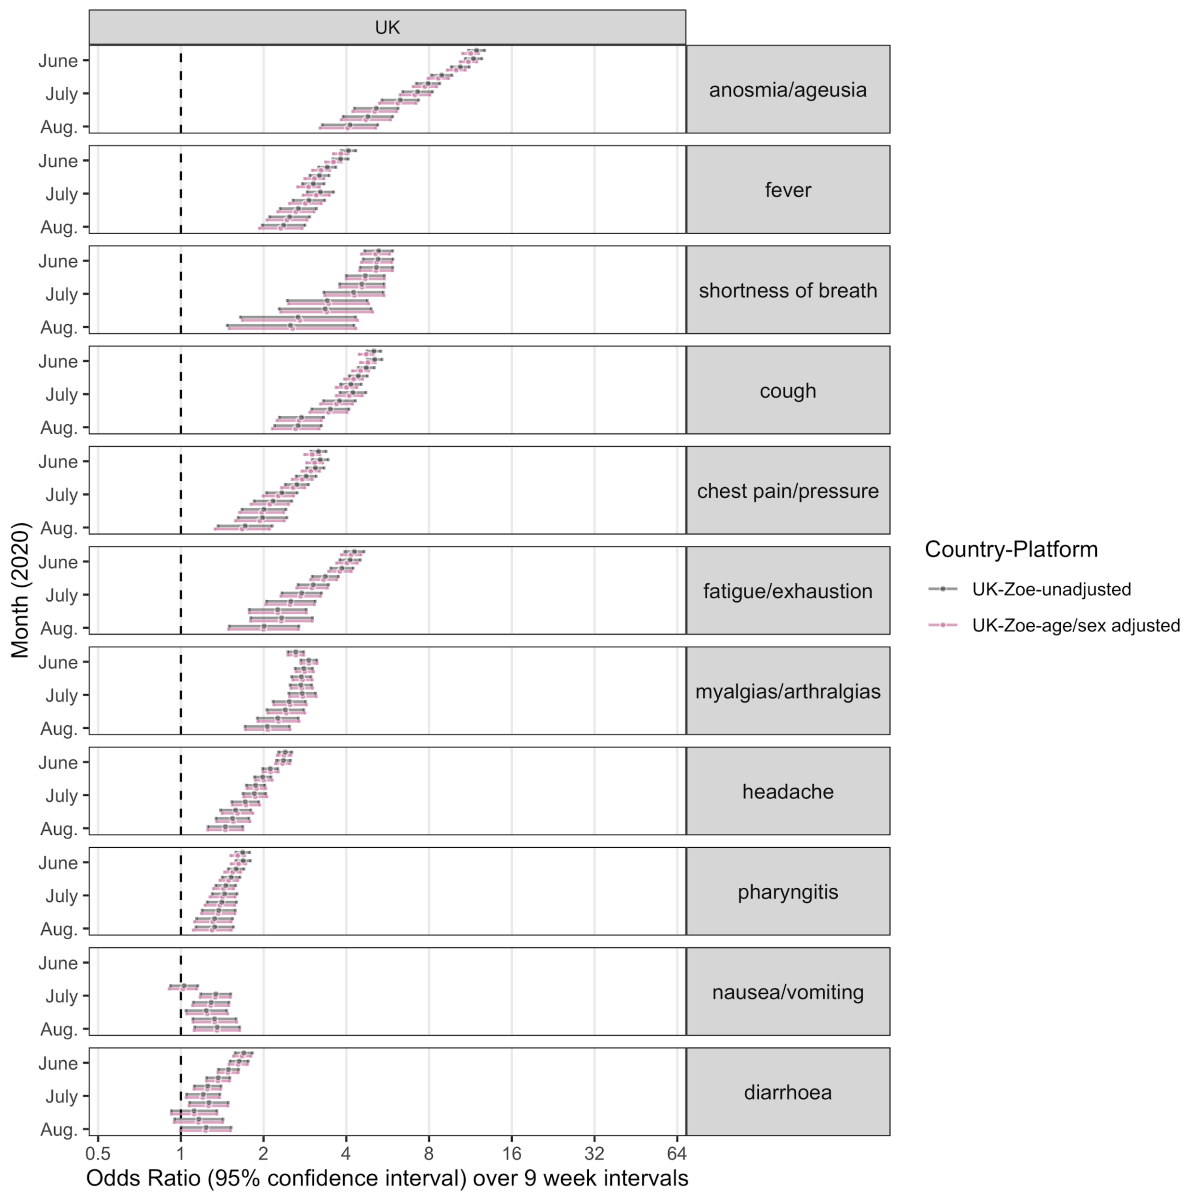

**Supplementary table 1:** Mapping of survey questions across platforms

Mapping of questions and symptoms across datasets. Eleven symptoms were shared across at least two of three platforms, after having excluded symptoms that were shared but had limited responses, and thus could not be compared (i.e. abdominal pain, rash, confusion). CMU/UMD english language survey translated into multiple languages for ex-US users.

| Label            | Survey        | Questions asked                                                                                                                                                                                 | Note / Date of change |
|------------------|---------------|-------------------------------------------------------------------------------------------------------------------------------------------------------------------------------------------------|-----------------------|
| Unhealthy report | US-CMU/UMD    | In the past 24 hours, have you personally experienced any of the following symptoms? (Select all that apply.)                                                                                   |                       |
|                  | Ex-US-CMU/UMD | In the last 24 hours, have you had any of the following?                                                                                                                                        |                       |
| Anosmia/ ageusia | US-CMU/UMD    | Loss of smell or taste                                                                                                                                                                          |                       |
|                  | Ex-US-CMU/UMD | Loss of smell or taste                                                                                                                                                                          |                       |
|                  | CSS UK        | Do you have a loss of smell/taste                                                                                                                                                               |                       |
|                  | Israel Corona | Are you experiencing loss of taste and/or smell sensation                                                                                                                                       |                       |
| Fever            | US-CMU/UMD    | Fever                                                                                                                                                                                           |                       |
|                  | Ex-US-CMU/UMD | Fever                                                                                                                                                                                           |                       |
|                  | CSS UK        | Do you have a fever or feel too hot                                                                                                                                                             |                       |
|                  | Israel Corona | What is your current body temperature?<br><input type="checkbox"/> I did not measure my temperature in the last 24 hours<br><input type="checkbox"/> I measured my temperature and it was _____ |                       |
| Chest pain       | US-CMU/UMD    | Persistent pain or pressure in your chest                                                                                                                                                       |                       |
|                  | Ex-US-CMU/UMD | Chest pain                                                                                                                                                                                      |                       |
|                  | CSS UK        | Are you feeling an unusual chest pain or tightness in your chest                                                                                                                                |                       |
|                  | Israel Corona | NA                                                                                                                                                                                              | NA                    |
| Short of         | US-CMU/UMD    | Shortness of breath                                                                                                                                                                             |                       |

|                |               |                                                                                                                            |               |
|----------------|---------------|----------------------------------------------------------------------------------------------------------------------------|---------------|
| breath         | Ex-US-CMU/UMD | Difficulty breathing                                                                                                       |               |
|                | CSS UK        | Are you experiencing unusual shortness of breath                                                                           |               |
|                | Israel Corona | Are you experiencing shortness of breath                                                                                   |               |
| Cough          | US-CMU/UMD    | Cough                                                                                                                      |               |
|                | Ex-US-CMU/UMD | Cough                                                                                                                      |               |
|                | CSS UK        | Do you have a persistent cough (coughing a lot for more than an hour or 3 or more coughing episodes in 24 hours)           |               |
|                | Israel Corona | Are you experiencing<br><input type="checkbox"/> Dry cough (no sputum)<br><input type="checkbox"/> Wet cough (with sputum) |               |
| Nausea / Vomit | US-CMU/UMD    | Nausea or vomiting                                                                                                         |               |
|                | Ex-US-CMU/UMD | Nausea                                                                                                                     |               |
|                | CSS UK        | Have you felt nauseous or experienced vomiting                                                                             | 29 April 2020 |
|                | Israel Corona | Are you experiencing nausea and /or vomiting                                                                               |               |
| Diarrhoea      | US-CMU/UMD    | Diarrhea                                                                                                                   |               |
|                | Ex-US-CMU/UMD | NA                                                                                                                         |               |
|                | CSS UK        | Are you experiencing diarrhoea                                                                                             |               |
|                | Israel Corona | Are you experiencing diarrhea                                                                                              |               |
| Fatigue        | US-CMU/UMD    | Tiredness or exhaustion                                                                                                    |               |
|                | Ex-US-CMU/UMD | Fatigue                                                                                                                    |               |
|                | CSS UK        | Are you experiencing unusual fatigue                                                                                       |               |
|                | Israel Corona | Are you experiencing fatigue                                                                                               |               |

|                     |               |                                                                                                                                                                                                                                                                                                                                                                                                                                                                                                                                                                                                         |  |
|---------------------|---------------|---------------------------------------------------------------------------------------------------------------------------------------------------------------------------------------------------------------------------------------------------------------------------------------------------------------------------------------------------------------------------------------------------------------------------------------------------------------------------------------------------------------------------------------------------------------------------------------------------------|--|
| Myalgia/art hralgia | US-CMU/UMD    | Muscle or joint aches                                                                                                                                                                                                                                                                                                                                                                                                                                                                                                                                                                                   |  |
|                     | Ex-US-CMU/UMD | Aches or muscle pain                                                                                                                                                                                                                                                                                                                                                                                                                                                                                                                                                                                    |  |
|                     | CSS UK        | Do you have unusual strong muscle pains                                                                                                                                                                                                                                                                                                                                                                                                                                                                                                                                                                 |  |
|                     | Israel Corona | Are you experiencing muscle pain                                                                                                                                                                                                                                                                                                                                                                                                                                                                                                                                                                        |  |
| Headache            | US-CMU/UMD    | NA                                                                                                                                                                                                                                                                                                                                                                                                                                                                                                                                                                                                      |  |
|                     | Ex-US-CMU/UMD | Headache                                                                                                                                                                                                                                                                                                                                                                                                                                                                                                                                                                                                |  |
|                     | CSS UK        | Do you have a headache                                                                                                                                                                                                                                                                                                                                                                                                                                                                                                                                                                                  |  |
|                     | Israel Corona | Are you experiencing headache                                                                                                                                                                                                                                                                                                                                                                                                                                                                                                                                                                           |  |
| Pharyngitis         | US-CMU/UMD    | Sore throat                                                                                                                                                                                                                                                                                                                                                                                                                                                                                                                                                                                             |  |
|                     | Ex-US-CMU/UMD | Sore throat                                                                                                                                                                                                                                                                                                                                                                                                                                                                                                                                                                                             |  |
|                     | CSS UK        | Do you have a sore throat                                                                                                                                                                                                                                                                                                                                                                                                                                                                                                                                                                               |  |
|                     | Israel Corona | Are you experiencing sore throat                                                                                                                                                                                                                                                                                                                                                                                                                                                                                                                                                                        |  |
| Test question       | US-CMU/UMD    | <p>[Asked to respondents who report at least 1 of 14 symptoms]</p> <p>Have you been tested for COVID-19 (coronavirus) for your current illness?</p> <p><input type="checkbox"/> Yes, I was tested, and received a positive diagnosis for COVID-19 (1)</p> <p><input type="checkbox"/> Yes, I was tested, but it was negative for COVID-19 (2)</p> <p><input type="checkbox"/> Yes, I was tested, but have not received the result (3)</p> <p><input type="checkbox"/> No, I tried to get tested but could not get a test (4)</p> <p><input type="checkbox"/> No, I have not tried to get tested (5)</p> |  |
|                     | Ex-US-CMU/UMD | <p>Have you ever been tested for coronavirus (COVID-19)? 1=Yes, 2=No</p> <p>[If Yes, respondents are asked]</p> <p>Have you been tested for coronavirus (COVID-19) in the last \${e://Field/sympdays} days?</p>                                                                                                                                                                                                                                                                                                                                                                                         |  |

|                     |               |                                                                                                                                                                                                                                                                                                                                                                                                                                                                                                         |  |
|---------------------|---------------|---------------------------------------------------------------------------------------------------------------------------------------------------------------------------------------------------------------------------------------------------------------------------------------------------------------------------------------------------------------------------------------------------------------------------------------------------------------------------------------------------------|--|
|                     |               | <p>[where sympdays field is from the question is asked to respondents who report at least 1 of 12, (through 7 May 2020) or of 13 symptoms] For how many days have you had at least one of these symptoms? [capped at 14 days]</p> <p>[If Yes, respondents are asked]<br/> Did your most recent test find that you had coronavirus (COVID-19)?<br/> 1=Yes<br/> 2=No<br/> 3=I don't know</p>                                                                                                              |  |
|                     | CSS UK        | <p>Initial test question:<br/> Have you had a Covid Test - If yes:<br/> Did you test positive<br/> Date inferred based on the date of result</p> <p>Update in question:<br/> Have you had a new Covid Test<br/> If yes -<br/> How was the test performed (description of test to infer whether antibody or swab test)<br/> What was the result<br/> When was your test</p>                                                                                                                              |  |
|                     | Israel Corona | <p>Online survey:<br/> Have you been tested for Covid-19 in the past (PCR test)?<br/> <input type="checkbox"/> Yes I've been tested<br/> <input type="checkbox"/> No</p> <p>If yes - Have you been tested positive to COVID-19 in one of the tests?</p> <p>1.Yes, on the date XX/XX/XX, Did you repeat the test from then? YES/NO<br/> If yes -what was the last date in which you were tested? XX/XX/XXX<br/> What was the result of the last test?<br/> Positive/Negative/ did not get the result</p> |  |
| Healthcare question | US-CMU/UMD    | <p>"In the past 5 days, have you worked or volunteered in a hospital, medical office, ambulance service, first responder services, or any other health care setting?"</p>                                                                                                                                                                                                                                                                                                                               |  |

|  |               |                                                                                                                                                                                                                                                                                                                                                                                                                                                                                                                                                                                                                                                                                                                                                                       |                                  |
|--|---------------|-----------------------------------------------------------------------------------------------------------------------------------------------------------------------------------------------------------------------------------------------------------------------------------------------------------------------------------------------------------------------------------------------------------------------------------------------------------------------------------------------------------------------------------------------------------------------------------------------------------------------------------------------------------------------------------------------------------------------------------------------------------------------|----------------------------------|
|  | Ex-US-CMU/UMD | <p>In the last 7 days, did you do any work for pay, or do any kind of business, farming, or other activity to earn money, even if only for one hour? 1=Yes 2=No</p> <p>[Respondents who answered Yes were asked]<br/>What is the main activity of the business or organization in which you work?</p> <p>[Respondents who answered No were asked]<br/>Before February 2020, were you working for pay, or doing any kind of business, farming, or other activity to earn money?</p> <p>[Respondents who answered Yes were asked]<br/>What is the main activity of the business or organization in which you were working before February 2020?</p> <p>Healthcare workers were defined as those selecting [7 = Health] to either of the above profession questions.</p> | Question introduced 27 June 2020 |
|  | CSS UK        | <p>Are you a healthcare worker (including hospital, elderly care or in the community)</p> <p><input type="checkbox"/> Yes currently treat patients</p> <p><input type="checkbox"/> Yes do not currently treat patients</p> <p><input type="checkbox"/> Yes currently interact with patients</p> <p><input type="checkbox"/> Yes but do not currently interact with patients</p> <p><input type="checkbox"/> No</p>                                                                                                                                                                                                                                                                                                                                                    |                                  |
|  | Israel Corona | <p>Do you work in a medical team, actively treating patients?</p> <p><input type="checkbox"/> Yes I'm a healthcare professional</p> <p><input type="checkbox"/> No</p>                                                                                                                                                                                                                                                                                                                                                                                                                                                                                                                                                                                                |                                  |



**Supplementary table 2:** Weighted analyses versus demographic characteristics for CMU/UMD Facebook COVID-19 Symptom Survey platform in the US, UK and Israel.

Baseline demographic characteristics of non-healthcare worker CMU/UMD platform survey respondents age  $\geq 18$  years reporting male or female sex, in relation to the census population, with and without application of survey weights.

|                                | United States  |                 |                | United Kingdom |                 |                | Israel         |                 |                |
|--------------------------------|----------------|-----------------|----------------|----------------|-----------------|----------------|----------------|-----------------|----------------|
|                                | Raw Survey     | Survey-Weighted | Country        | Raw Survey     | Survey-Weighted | Country        | Raw Survey     | Survey-Weighted | Country        |
| Age (adults only)<br>mean (sd) | 48.5<br>(16.3) | 48.7<br>(0.01)  | 47.8<br>(18.3) | 43.0<br>(15.6) | 48.3<br>(0.05)  | 48.6<br>(18.6) | 47.5<br>(17.5) | 45.4<br>(0.09)  | 44.9<br>(18.5) |
| Sex (%male)                    | 33.3           | 48.1            | 49.5           | 36.9           | 49.2            | 49.5           | 49.1           | 47.8            | 48.8           |

Supplementary table 3 – For each symptom, overall OR observed for the population combined from the six different sources along with their 95% confidence interval

| Symptom             | Aggregated OR and 95% CI |
|---------------------|--------------------------|
| anosmia/ageusia     | 16.96 [13.13 ; 21.92]    |
| fever               | 6.45 [4.25 ; 9.81]       |
| shortness of breath | 4.69 [3.14 ; 7.01]       |
| cough               | 4.29 [3.13 ; 5.88]       |
| chest pain/pressure | 3.57 [2.85 ; 4.48]       |
| fatigue/exhaustion  | 3.43 [2.49 ; 4.73]       |
| myalgias/artralgias | 3.52 [2.19 ; 5.66]       |
| headache            | 3.46 [2.76 ; 4.34]       |
| pharyngitis         | 2.48 [1.71 ; 3.59]       |
| nausea/vomiting     | 2.39 [1.49 ; 3.82]       |
| diarrhoea           | 1.86 [1.63 ; 2.12]       |
